# Supplementary material for: Transforming descending input into motor output: An analysis of the Drosophila Male Adult Nerve Cord connectome
Source: bioRxiv preprint, doi:10.1101/2023.06.07.543976, version 3 (2025-06-03)
Supplement: Supplemental file 5 [file 543976_file06.xlsx]

## Sheet: Sheet1
group	pre_over_size	std_dev	transmission	manually_inspected	has_dcvs	has_tracing_issues	dont_consider_electrical	notes
10073	1.31056e-08	2.94716e-09	electrical	TRUE	FALSE	FALSE		w-cHIN
10201	1.39917e-08	4.24756e-11	putative electrical	TRUE	FALSE	FALSE
10170	1.42006e-08	1.84863e-09	electrical	TRUE	FALSE	FALSE		w-cHIN
10132	1.52629e-08	1.52658e-10	putative electrical	TRUE	FALSE	FALSE
10042	2.02258e-08	4.16086e-09	putative electrical	TRUE	FALSE	FALSE
10275	2.24498e-08	6.38649e-09	putative electrical	TRUE	FALSE	FALSE
10147	2.65467e-08	8.54265e-09	electrical	TRUE	FALSE	FALSE		w-cHIN
10510	3.09367e-08	9.47649e-09	electrical	TRUE	FALSE	FALSE		w-cHIN
11486	3.81656e-08	5.629e-09	putative electrical	TRUE	FALSE	FALSE
10667	4.07123e-08	2.02314e-09	electrical	TRUE	FALSE	FALSE		w-cHIN
15495	4.70547e-08	1.24496e-08	putative electrical	TRUE	FALSE	FALSE
10151	5.73787e-08	3.92409e-09	putative electrical	TRUE	FALSE	FALSE
10598	5.86198e-08	1.0076e-08	electrical	TRUE	FALSE	FALSE		n-cHIN
13201	5.86229e-08	3.99033e-09	putative electrical	TRUE	FALSE	FALSE
10326	5.99536e-08	5.8704e-09	putative electrical	TRUE	FALSE	FALSE
11181	6.37444e-08	4.4191e-09	putative electrical	TRUE	FALSE	FALSE
10177	6.65446e-08	3.60683e-10	putative electrical	TRUE	FALSE	FALSE
11313	6.75416e-08	2.66812e-09	putative electrical	TRUE	FALSE	FALSE
34801	7.0519e-08	8.74209e-09		TRUE	FALSE	TRUE	TRUE	both badly traced
11142	7.67069e-08	8.41525e-09	putative electrical	TRUE	FALSE	FALSE
31794	8.10333e-08			TRUE	FALSE	TRUE	TRUE	all group members have severe reconstruction issues
12947	8.14228e-08	1.53005e-09	putative electrical	TRUE	FALSE	FALSE		n-cHIN
12943	9.0914e-08	6.75697e-09	putative electrical	TRUE	FALSE	FALSE
35248	1.06042e-07			TRUE	FALSE	TRUE	TRUE	all group members have severe reconstruction issues
10817	1.1313e-07	1.83792e-08	putative electrical	TRUE	FALSE	FALSE
12316	1.14212e-07	3.53561e-08	putative electrical	TRUE	FALSE	FALSE		cHIN-like
10629	1.16936e-07	1.60025e-08	putative electrical	TRUE	FALSE	FALSE
10964	1.22273e-07	3.11885e-08	putative electrical	TRUE	FALSE	FALSE
38189	1.26011e-07	4.9352e-08	putative electrical	TRUE	FALSE	TRUE		some badly reconstructed
20503	1.27424e-07	7.58364e-09	putative electrical	TRUE	FALSE	FALSE
33017	1.37133e-07	2.18401e-08		TRUE	FALSE	TRUE	TRUE	all group members have severe reconstruction issues
26961	1.38362e-07	1.18376e-07		TRUE	FALSE	TRUE		L badly reconstructed
26870	1.46029e-07	6.78557e-09	putative electrical	TRUE	FALSE	FALSE
18069	1.51379e-07	7.1782e-08	putative electrical	TRUE	FALSE	TRUE
19943	1.5371e-07	8.78479e-08	putative electrical	TRUE	FALSE	TRUE
17891	1.56726e-07	3.99836e-08	putative electrical	TRUE	FALSE	FALSE
14085	1.5907e-07	7.71607e-08		TRUE	FALSE	TRUE	TRUE	L badly reconstructed
22548	1.6032e-07	5.94671e-08	putative electrical	TRUE	FALSE	TRUE		L badly reconstructed
13148	1.62942e-07	2.7422e-09	putative electrical	TRUE	FALSE	FALSE		cHIN-like
18088	1.64939e-07	1.31584e-08	putative electrical	TRUE	FALSE	FALSE
37628	1.67028e-07	1.61855e-08	putative electrical	TRUE	FALSE	TRUE
19979	1.6743e-07	2.90924e-08	putative electrical	TRUE	FALSE	TRUE		same group as 18088?
13287	1.6876e-07	1.28438e-08	putative neurosecretory	TRUE	TRUE	FALSE	TRUE
30927	1.69108e-07	5.56812e-08	putative electrical	TRUE	FALSE	TRUE
40296	1.69843e-07	1.05633e-07		TRUE	FALSE	TRUE	TRUE	both badly traced?
10497	1.70376e-07	1.69182e-07		TRUE	FALSE	TRUE	TRUE	left neuron severely degrading
14743	1.70677e-07	1.33427e-08	putative electrical	TRUE	FALSE	FALSE		cHIN-like
15651	1.70727e-07	6.2452e-08	putative electrical	TRUE	FALSE	FALSE
24279	1.71732e-07	9.14511e-08	putative electrical	TRUE	FALSE	TRUE
13094	1.719e-07	1.5158e-08	putative electrical	TRUE	FALSE	FALSE		cHIN-like
20323	1.76587e-07	6.74112e-08	putative electrical	TRUE	FALSE	TRUE
22927	1.80684e-07	5.4193e-08	putative electrical	TRUE	FALSE	FALSE
18341	1.82297e-07	4.44087e-08	putative electrical	TRUE	FALSE	TRUE
39860	1.8358e-07	3.55985e-08		TRUE	FALSE	TRUE	TRUE	all badly traced
19517	1.84083e-07	2.05547e-08	putative electrical	TRUE	FALSE	FALSE
17660	1.85232e-07	1.15945e-08		TRUE	FALSE	FALSE		LTct, morphology not like other electrical
31974	1.8688e-07			TRUE	FALSE	TRUE	TRUE	singleton
23228	1.87057e-07	4.66055e-08		TRUE	FALSE	TRUE	TRUE	L side morphology different?
22121	1.90366e-07	8.99667e-08	putative electrical	TRUE	FALSE	TRUE		L side missing axons, but is like some other neurons above
12481	1.91244e-07	4.80714e-09	putative electrical	TRUE	FALSE	FALSE		cHIN-like
19889	1.92946e-07	2.75708e-08	putative electrical	TRUE	FALSE	FALSE
11644	1.93728e-07	1.8297e-08	putative electrical	TRUE	FALSE	FALSE
16427	1.95172e-07	1.60825e-08		TRUE	FALSE	FALSE
17111	1.97488e-07	4.01596e-08	putative electrical	TRUE	FALSE	FALSE
18306	1.99858e-07	2.97388e-08		TRUE	FALSE	FALSE
12983	2.00544e-07	2.3712e-08	putative neurosecretory	TRUE	TRUE	FALSE	TRUE
10389	2.0057e-07	1.17355e-07		TRUE	FALSE	TRUE
25813	2.01409e-07	8.92735e-08		TRUE	FALSE	TRUE
23435	2.02306e-07	1.45753e-08		TRUE	FALSE	FALSE
13284	2.02934e-07	2.01057e-08
12938	2.02963e-07	7.72235e-09
16214	2.1052e-07	3.30118e-08
12950	2.10801e-07	1.92224e-09	putative electrical
12056	2.11307e-07	3.961e-08	putative electrical
15713	2.11616e-07	2.86467e-08	putative electrical					n-cHIN
12952	2.11848e-07	2.6585e-07
23360	2.12766e-07	1.12598e-08
32450	2.16541e-07	9.60381e-08
13639	2.1749e-07	3.00424e-08
15336	2.18442e-07	1.39136e-08
42764	2.189e-07	3.88071e-08
19368	2.18929e-07	1.1952e-08
18097	2.18996e-07	4.02084e-09
19416	2.20232e-07	5.27363e-08
17704	2.23775e-07	6.43186e-09
16455	2.23851e-07	8.44162e-09
19603	2.23912e-07	4.9749e-08
25305	2.24192e-07	2.71636e-08
13219	2.26663e-07	2.41642e-08	putative neurosecretory
12752	2.27078e-07	2.85159e-09
11138	2.27491e-07	3.30675e-08	putative electrical
10393	2.2757e-07	3.90618e-08
20310	2.27725e-07	6.03118e-09
24330	2.28727e-07	1.91182e-08
28492	2.29025e-07	4.41913e-09
11390	2.29394e-07	5.51276e-09
15900	2.30268e-07	1.27637e-08
14379	2.30478e-07	4.52009e-08
12858	2.3188e-07	1.17041e-08	putative electrical
10764	2.33103e-07	2.56762e-08
15761	2.3474e-07	2.00231e-08
29717	2.34999e-07	6.34534e-08
21111	2.37908e-07	1.23163e-08
13370	2.38461e-07	6.18138e-09
14080	2.39718e-07	2.36867e-08
19999	2.39997e-07	3.11248e-08
10054	2.4018e-07	3.99496e-09
14025	2.4062e-07	1.39977e-08
25106	2.40882e-07	3.53956e-08
20314	2.43692e-07	1.53249e-09
26228	2.43818e-07	1.21309e-08
21769	2.44019e-07	1.67103e-07
10143	2.46455e-07	1.05236e-08
19166	2.46485e-07	1.73675e-11
21830	2.46498e-07	2.99632e-08
38208	2.46887e-07	3.20539e-08
26281	2.47533e-07	6.6962e-08
20065	2.4783e-07	2.79458e-08
17047	2.49235e-07
22742	2.50526e-07	1.2824e-07
12112	2.50677e-07	1.93209e-08	putative electrical
14501	2.51566e-07	1.86135e-08	putative neurosecretory
18054	2.51629e-07	3.95316e-08
10425	2.51792e-07	2.50878e-08
12321	2.51808e-07	7.35292e-09
16479	2.52072e-07	1.61547e-07
17901	2.52143e-07	2.53386e-09
18063	2.53275e-07	1.02018e-08	putative electrical
27257	2.53391e-07	1.30477e-08
21119	2.54279e-07	2.81644e-08
17119	2.54362e-07	1.26526e-08	putative electrical
23565	2.5512e-07	7.12315e-08
15378	2.55447e-07	1.05972e-07
20802	2.5633e-07	4.29162e-08
10144	2.56713e-07	1.67495e-09
17315	2.57186e-07	2.49476e-08
18507	2.5776e-07	1.56828e-08
24956	2.57848e-07	1.95197e-09
10888	2.58201e-07	1.5823e-07
17558	2.58377e-07	9.40026e-10
10154	2.58519e-07	1.50171e-09
16186	2.60375e-07	1.0454e-08
156198	2.60434e-07	3.17323e-08
12978	2.60496e-07	2.148e-08
28474	2.62172e-07	6.43379e-09
27555	2.6235e-07	1.64336e-08
22376	2.63412e-07	5.36958e-08
29339	2.63651e-07	1.67215e-07
22303	2.63706e-07	6.50304e-08
22504	2.63799e-07	1.97035e-08
152347	2.6439e-07	1.41392e-09
14639	2.65166e-07	4.6621e-08
15286	2.66072e-07	1.02222e-08
11793	2.66444e-07	2.73624e-08
11103	2.6779e-07	1.39739e-08
20102	2.69252e-07	6.7036e-09
14387	2.69296e-07	1.39248e-07
19148	2.70117e-07	3.54898e-08
19796	2.71044e-07	1.97163e-08
15887	2.71687e-07	1.01765e-08
31871	2.72042e-07	2.89534e-10
10305	2.72222e-07	4.67802e-09
10173	2.7372e-07	1.39625e-08
17441	2.73727e-07	4.35164e-08
10236	2.7399e-07	3.10518e-09
22847	2.74366e-07	2.90623e-08
22766	2.74477e-07	3.55159e-08
11277	2.76245e-07	2.13673e-08
10523	2.76818e-07	2.48988e-09
13408	2.7702e-07	2.44499e-08
26129	2.77283e-07	1.66697e-08
19697	2.77927e-07	2.6227e-08
23428	2.7794e-07	2.99253e-08
16140	2.78222e-07	3.40526e-08
19157	2.78335e-07	3.22397e-08
10705	2.78801e-07	5.61733e-09
10226	2.79413e-07	2.79028e-09
10580	2.79439e-07	1.3027e-08
10826	2.79803e-07	1.10092e-08
12262	2.80168e-07	9.61158e-09
19553	2.80466e-07	8.52543e-09
17641	2.82472e-07	2.89134e-09
15963	2.82478e-07	5.95799e-08
19331	2.82615e-07	4.80551e-08
10991	2.82716e-07	5.13404e-09
21957	2.82748e-07	2.61239e-08
10432	2.82966e-07	1.56168e-08
11011	2.83097e-07	2.57635e-08
33196	2.8318e-07	2.67915e-08
31627	2.83378e-07	1.99915e-08
18985	2.83743e-07	2.47304e-08
20154	2.84593e-07	1.55662e-08
23372	2.85886e-07	6.89722e-09
20824	2.86186e-07	1.20053e-08
24374	2.86227e-07	1.4119e-07
23894	2.86413e-07	1.09527e-08
10384	2.86431e-07	1.69377e-08
20366	2.8774e-07	1.69854e-08
23151	2.88242e-07	2.44156e-08
10793	2.88244e-07	1.26007e-08
11411	2.89142e-07	6.68254e-09
13011	2.89343e-07	2.13833e-09
30728	2.90001e-07	1.96723e-08
42476	2.90465e-07	1.04922e-09
19755	2.91039e-07	5.81655e-08
10659	2.91194e-07	4.21873e-09
11780	2.91299e-07	1.02184e-08
11472	2.91326e-07	6.53553e-08
21614	2.91452e-07	4.1286e-08
19317	2.92185e-07	6.30613e-09
20365	2.92526e-07	9.71286e-09
10475	2.92896e-07	9.43994e-09
17203	2.93006e-07	5.52819e-09
14621	2.93555e-07	5.50843e-08
24352	2.93617e-07	1.2736e-08
18159	2.93774e-07	9.18405e-09	putative neurosecretory
24103	2.94232e-07	3.03913e-08
23875	2.94388e-07	4.11275e-09
14349	2.94659e-07	5.60505e-09
16514	2.94684e-07	1.48002e-08
16458	2.94767e-07	5.97506e-08
13377	2.95388e-07	2.52029e-09	putative electrical
21476	2.95964e-07	6.96481e-09
20003	2.96041e-07	2.08098e-08
13638	2.96431e-07	4.08485e-08
10463	2.9665e-07	1.26423e-08
11504	2.96763e-07	3.90492e-08
10190	2.97189e-07	3.63468e-09	putative neurosecretory
13756	2.9725e-07	8.39696e-09	putative electrical
10385	2.9751e-07	1.19996e-08
22270	2.97735e-07	1.7343e-08
28994	2.98195e-07	4.1073e-08
19632	2.98336e-07	1.34017e-08
12968	2.99121e-07	5.51602e-09
14309	2.9944e-07	4.40348e-08
20837	2.99903e-07	2.80957e-08
19217	3.00029e-07	1.47739e-08
17951	3.00706e-07	1.70051e-08
16093	3.00882e-07	4.72039e-08
22937	3.00954e-07	4.58972e-08
19226	3.00975e-07	9.01022e-08
35423	3.00986e-07	6.80319e-08
31388	3.01054e-07	1.56656e-08
24213	3.01605e-07	1.99888e-08
17657	3.02935e-07	1.40873e-08
18647	3.02957e-07	2.75577e-08
21396	3.03619e-07	1.71969e-08
19827	3.0384e-07	4.8268e-08
20608	3.04563e-07	5.01741e-09
21788	3.06398e-07	8.26248e-08
11511	3.06407e-07	3.0247e-09
14778	3.07126e-07	2.21853e-08
16154	3.07282e-07	4.46719e-08
18652	3.07427e-07	8.43647e-08
15414	3.07629e-07	4.62107e-08
27304	3.07812e-07	2.39396e-08
20754	3.08098e-07	1.65491e-08
23003	3.10309e-07	3.19897e-07
11029	3.10967e-07	1.94696e-08
11509	3.11491e-07	2.44014e-08
30070	3.12328e-07	3.16808e-08
17813	3.12669e-07	4.21684e-08
21110	3.12713e-07	1.92638e-08
10376	3.13224e-07	3.15821e-08
10454	3.1378e-07	4.11612e-09
11369	3.14107e-07	1.00861e-08
16298	3.14379e-07	2.73954e-09
13353	3.14728e-07	1.61136e-08	putative electrical
19326	3.148e-07	2.04758e-08
16910	3.14814e-07	1.79771e-08
26934	3.15128e-07	4.5317e-08
23023	3.15634e-07	2.68272e-08
25461	3.15639e-07	5.02435e-08
10776	3.15734e-07	8.00034e-09
13696	3.15836e-07	2.60795e-08
10488	3.16378e-07	2.04467e-09
27297	3.16781e-07	2.21237e-09
10692	3.1708e-07	1.093e-08
10652	3.17913e-07	3.4587e-09
16073	3.18653e-07
11652	3.18732e-07	2.75109e-09
21316	3.18905e-07	2.20947e-08
11747	3.19194e-07	2.41243e-08
25229	3.19541e-07	2.7676e-08
14614	3.19573e-07	5.82904e-08
17428	3.19627e-07	8.18596e-09
13109	3.20205e-07	1.45969e-08
16581	3.2021e-07	1.55603e-08
22669	3.21045e-07	2.71453e-07
10370	3.2178e-07	1.40666e-08
16935	3.21925e-07	1.12073e-09
25808	3.22021e-07	6.02821e-09
24899	3.22159e-07	5.12247e-09
14731	3.22453e-07	4.59869e-09
18049	3.22565e-07	1.61839e-08
34059	3.22763e-07	3.60046e-08
10791	3.23844e-07	4.66939e-09
10337	3.2422e-07	1.81544e-08
10415	3.24525e-07	2.38575e-08
10010	3.24892e-07	1.63163e-08
12887	3.25132e-07	1.85211e-08
14083	3.25176e-07	1.23006e-08
15415	3.25348e-07	2.58082e-08
15370	3.25851e-07	8.61355e-09
17447	3.26238e-07	4.98889e-09
24058	3.26284e-07	1.50444e-08
24161	3.26567e-07	3.60007e-09
17508	3.26675e-07	4.81808e-08
12418	3.27024e-07	9.08866e-09
10763	3.27042e-07	6.29702e-09
10228	3.27108e-07	4.7963e-08	electrical
16996	3.27595e-07	8.32572e-09
18129	3.28059e-07	2.50826e-08
14550	3.28727e-07	3.13561e-08
10499	3.28761e-07	1.10559e-08
10193	3.29431e-07	5.25042e-09
22809	3.29543e-07	7.87162e-09
15903	3.29796e-07	2.97634e-08
15946	3.29892e-07	1.75203e-08
25684	3.30389e-07	2.09968e-08
24530	3.30896e-07	5.09137e-08
19211	3.30932e-07	2.53465e-08
15696	3.31199e-07	2.21e-08
10087	3.31288e-07	1.3708e-08
16397	3.31691e-07	2.6701e-08
14631	3.31743e-07	2.79741e-08
11857	3.32128e-07	9.63769e-09
10071	3.32227e-07	3.811e-08
10253	3.32252e-07	3.10353e-08
17318	3.32837e-07	9.93414e-09
10202	3.32942e-07	8.38527e-09
12387	3.3347e-07	6.26689e-08
10233	3.33473e-07	1.73467e-08
13632	3.34174e-07	2.90789e-09
24163	3.344e-07	2.96457e-08
20913	3.34915e-07	8.03646e-08
16388	3.3519e-07	1.6609e-08
20471	3.35476e-07	1.5553e-08
12580	3.35917e-07	3.17138e-08
17269	3.36676e-07	7.00429e-09
24823	3.3684e-07	8.18571e-09
22551	3.37272e-07	5.09583e-08
12121	3.3778e-07	2.8822e-08
12182	3.37883e-07	6.93147e-08
14971	3.38002e-07	1.00564e-07
10262	3.38119e-07	1.79592e-08
30655	3.38286e-07	7.52861e-08
17138	3.38523e-07	8.55256e-10
16659	3.38603e-07	5.54516e-09
153507	3.38918e-07	4.99579e-08
15781	3.39285e-07	3.97118e-08
24981	3.3939e-07	2.42001e-08
14065	3.39455e-07	1.68454e-08
24564	3.40097e-07	3.96214e-08
10569	3.40102e-07	3.49773e-08
10124	3.4044e-07	2.02234e-08
13833	3.40496e-07	2.47203e-08
24146	3.40589e-07	5.18625e-08
20080	3.40896e-07	2.35218e-08
10731	3.41009e-07	3.53918e-09
18026	3.41325e-07	6.36795e-09
10662	3.41371e-07	1.84288e-08
19267	3.41403e-07	1.77557e-08
15774	3.41494e-07	2.57614e-08
14573	3.41726e-07	1.59896e-09
13975	3.41736e-07	1.80653e-08
21741	3.41867e-07	5.10662e-08
13762	3.42023e-07	4.32401e-09
14516	3.42378e-07	2.90939e-08
11030	3.42662e-07	7.75665e-10
28649	3.42754e-07	2.53717e-08
15205	3.4277e-07	1.8553e-08
14816	3.42897e-07	4.36862e-08
10474	3.43249e-07	4.58452e-09
16812	3.43266e-07	3.19821e-08
29748	3.43538e-07	6.67409e-08
28019	3.43809e-07	3.92425e-08
10380	3.43895e-07	1.57816e-09
10736	3.44094e-07	2.52287e-09
11363	3.44111e-07	2.22157e-08
23877	3.44169e-07	1.82788e-08
19199	3.44676e-07	1.43816e-08
12745	3.44689e-07	1.02417e-07
10357	3.44715e-07	8.07505e-08
10635	3.44881e-07	3.35174e-08
12738	3.44913e-07	4.34369e-09
24241	3.45118e-07	3.17368e-08
24750	3.45541e-07	1.89076e-08
28806	3.45656e-07	1.02375e-08
19410	3.45876e-07	1.56556e-07
10522	3.46171e-07	5.02649e-08
21874	3.46176e-07	1.65245e-08
20857	3.46297e-07	1.53133e-08
17990	3.46384e-07	2.77461e-08
22869	3.46691e-07	1.23562e-08
23473	3.46723e-07	3.26134e-09
100513	3.47068e-07	2.31083e-08
19125	3.47074e-07	6.13001e-08	putative electrical
16779	3.47113e-07	4.11539e-08
30162	3.47254e-07	3.07481e-09
10671	3.47519e-07	1.41517e-08
19607	3.47741e-07	2.60056e-08
13995	3.47809e-07	4.83299e-08
14142	3.47962e-07	1.7105e-08
22737	3.48595e-07	5.3075e-08
18428	3.4861e-07	1.09247e-08
24527	3.48667e-07	6.96318e-08
14466	3.48732e-07	2.56295e-08
10372	3.48861e-07	8.94832e-08
11299	3.49176e-07	6.17653e-09
15933	3.4923e-07	2.68852e-08
18722	3.49287e-07	2.42016e-08
10352	3.49388e-07	9.80154e-09
10485	3.4949e-07	3.31176e-09
13897	3.49822e-07	2.67058e-08
17597	3.50171e-07	4.68561e-08
23233	3.50187e-07	2.42403e-09
18294	3.50215e-07	7.26257e-09
11795	3.50273e-07	1.9324e-08
11882	3.50475e-07	7.24486e-08
102694	3.50486e-07	1.36015e-08
18695	3.50799e-07	2.39811e-08
10961	3.50837e-07	4.32219e-09
26454	3.50897e-07	3.17959e-08
10586	3.51427e-07	2.86202e-08
28129	3.51463e-07	8.25662e-08
22293	3.51565e-07	2.71318e-08
18378	3.51917e-07	8.85988e-09
10362	3.51978e-07	4.34689e-09
10653	3.52179e-07	9.99304e-09
19489	3.52259e-07	1.85195e-08
19457	3.52576e-07	3.22645e-08
15467	3.52771e-07	2.26388e-09
20311	3.52937e-07	3.79746e-08
20125	3.53503e-07	4.455e-08
18211	3.53656e-07	1.09189e-07
39733	3.53675e-07	1.62561e-09
15140	3.54396e-07	5.65977e-09
10398	3.54798e-07	5.0114e-09
12928	3.5482e-07	2.16803e-08
10630	3.55056e-07	1.24215e-08
13321	3.55147e-07	3.00588e-08
20733	3.55276e-07	9.48887e-09
27302	3.55371e-07	2.51e-08
11752	3.55545e-07	6.13673e-09
20905	3.55939e-07	3.39717e-08
28739	3.55945e-07	1.24357e-07
17802	3.56177e-07	7.25837e-08
15433	3.5623e-07	8.55439e-09
22804	3.56525e-07	6.0539e-08	putative electrical
10945	3.56575e-07	3.41402e-09
28516	3.56781e-07	6.74419e-09
13689	3.56987e-07	7.84877e-09
100911	3.56999e-07	1.57132e-08
13469	3.57123e-07	2.85527e-08
16334	3.57142e-07	1.01775e-09
12399	3.57183e-07	8.82246e-09
36453	3.57188e-07	3.25302e-08
16078	3.5741e-07	5.03413e-09
16770	3.57733e-07	3.71768e-08
23816	3.57859e-07	2.40567e-08
11235	3.58062e-07	6.13952e-08
10422	3.58181e-07	1.11299e-08
16319	3.58244e-07	5.83198e-08
10188	3.58708e-07	1.08e-08
23005	3.59103e-07	3.4362e-08
15972	3.59198e-07	6.62366e-08
12089	3.59649e-07	3.20577e-09
22331	3.59719e-07	1.32402e-08
23413	3.59957e-07	2.208e-08
13468	3.59999e-07	3.27252e-08
13335	3.60063e-07	1.83258e-08
12839	3.60354e-07	1.90571e-09
30861	3.60513e-07	5.11396e-08
26107	3.60533e-07	1.05906e-08
19900	3.6081e-07	7.55572e-10
14125	3.60832e-07	2.20029e-08
20829	3.60879e-07	2.07273e-08
10259	3.61288e-07	9.40648e-09
16778	3.61564e-07	4.71091e-08
10833	3.61809e-07	9.75232e-09
18626	3.62185e-07	2.89339e-09
13713	3.62191e-07	1.19274e-10
15619	3.62242e-07	2.5631e-08
21997	3.62445e-07	1.48026e-08
10134	3.62471e-07	8.87649e-08
10108	3.62585e-07	1.67427e-08
16912	3.62736e-07	4.57508e-08
20130	3.62878e-07	3.85274e-08
22790	3.62878e-07	6.27805e-09
17552	3.63427e-07	4.57747e-08
22403	3.63452e-07	6.01695e-08
11131	3.63783e-07	1.28662e-08
22250	3.63803e-07	1.49583e-08
19957	3.6381e-07	6.75913e-08
12553	3.64273e-07	4.06072e-09
159066	3.64277e-07	4.7628e-09
17069	3.64325e-07	1.21778e-08
102304	3.64339e-07	1.47996e-08
18592	3.64415e-07	4.23835e-08
11833	3.64457e-07	2.82069e-08
12007	3.64457e-07	2.57213e-10
10711	3.64724e-07	8.77179e-08
10534	3.64996e-07	2.65976e-08
23707	3.65e-07	2.21923e-08
25372	3.65201e-07	1.12894e-08
15842	3.65219e-07	7.45868e-09
23513	3.65273e-07	1.57419e-08
10409	3.65704e-07	2.71792e-11
16191	3.66215e-07	6.43229e-09
10779	3.66248e-07	1.08828e-08
19054	3.67055e-07	4.92241e-09
21277	3.67245e-07	8.57456e-08
28910	3.673e-07	1.17342e-08
23146	3.67455e-07	3.30484e-09
14696	3.67506e-07	3.33026e-08
22639	3.67683e-07	3.27867e-08
21859	3.67938e-07	2.56606e-08
10150	3.6798e-07	1.50635e-08
24477	3.68122e-07	4.3794e-09
17747	3.68195e-07	2.08461e-08
23702	3.68316e-07	4.02657e-08
18392	3.68664e-07	2.01305e-08
16165	3.68976e-07	3.10559e-07
21435	3.69514e-07	5.12043e-09
29060	3.69653e-07	2.56231e-08
21430	3.69824e-07	3.19135e-08
20299	3.70021e-07	4.42882e-08
21010	3.70397e-07	1.80649e-09
14183	3.70652e-07	3.12023e-08
20933	3.70655e-07	2.24429e-08
15269	3.70842e-07	3.19413e-08
16523	3.70859e-07	1.76442e-08
30864	3.70876e-07	5.17004e-08
11848	3.70966e-07	2.41416e-08
16646	3.70995e-07	4.43962e-09
10089	3.71013e-07	5.08605e-09
14785	3.71193e-07	3.3772e-07
13602	3.71199e-07	2.0829e-08
15525	3.71212e-07	2.01039e-08
21913	3.71306e-07	1.08631e-08
14641	3.71309e-07	4.07076e-09	putative neurosecretory
20493	3.71556e-07	2.16577e-08
23765	3.71628e-07	3.03344e-08
14980	3.71675e-07	5.93888e-09
20715	3.71815e-07	4.47569e-08
19860	3.72287e-07	2.33535e-08
14038	3.7243e-07	1.64474e-09
11141	3.72556e-07	4.72339e-09
10889	3.72743e-07	2.6361e-08
14900	3.72763e-07	2.60704e-08
28269	3.72894e-07	2.98796e-08
19406	3.73094e-07	1.06314e-07
21393	3.73118e-07	7.67267e-08
13850	3.73166e-07	5.87212e-10
24397	3.73247e-07	1.44722e-08
24490	3.73256e-07	1.15954e-08
27587	3.73826e-07	1.36599e-08
18851	3.74022e-07	3.68114e-09
15959	3.74061e-07	2.03992e-08
18688	3.74101e-07	3.57864e-08
16118	3.74257e-07	5.25412e-08
22148	3.7436e-07	6.01091e-09
14423	3.74382e-07	1.309e-08
19653	3.74509e-07	1.47037e-08
21512	3.74608e-07	1.43872e-08
21657	3.747e-07	1.82685e-08
12450	3.74748e-07	4.99629e-08
14024	3.74769e-07	2.3161e-08
10680	3.7516e-07	6.09159e-09
11620	3.7527e-07	2.64642e-08
25523	3.75454e-07	4.79521e-08
20760	3.76455e-07	1.20241e-08
26139	3.76532e-07	1.18587e-08
24215	3.76572e-07	1.3993e-08
22657	3.76629e-07	1.48319e-07
18855	3.7675e-07	1.09694e-07
16800	3.76958e-07	8.00589e-09
12250	3.77e-07	1.81623e-09
14738	3.77249e-07	1.70845e-08
31908	3.77278e-07	4.04151e-08
11799	3.77494e-07	2.41663e-08
15413	3.77629e-07	8.06304e-08
19098	3.7763e-07	2.64961e-08
21943	3.77742e-07	4.79266e-08
156699	3.77809e-07	3.02986e-08
20929	3.77816e-07	1.05168e-08
19819	3.77922e-07	1.23063e-10
10148	3.78286e-07	1.00981e-08
13018	3.7829e-07	1.84438e-08
16092	3.78358e-07	5.02051e-09
13659	3.78406e-07	3.19593e-08
29277	3.78732e-07	3.97232e-08
10890	3.79006e-07	4.47732e-09
25776	3.7912e-07	5.74482e-09
15819	3.79168e-07	1.68679e-08
10722	3.7942e-07	3.04799e-08
17260	3.79442e-07	3.50876e-08
28977	3.7945e-07	6.91494e-09
18310	3.79654e-07	5.87958e-09
15516	3.79719e-07	2.79229e-09
15050	3.79753e-07	2.8858e-08
11495	3.79823e-07	5.2262e-09
17818	3.80098e-07	9.4332e-09
12804	3.80132e-07	2.9564e-08
13193	3.80175e-07	9.2665e-09
11215	3.80195e-07	9.94232e-09
18000	3.80244e-07	1.60456e-08
21191	3.80306e-07	8.54283e-09
26474	3.80336e-07	7.6919e-09
18550	3.80524e-07	4.2736e-09
22374	3.80689e-07	5.18249e-08
12918	3.80833e-07	9.14485e-08
16048	3.80879e-07	1.18184e-08
25799	3.81038e-07	5.37209e-08
16674	3.81182e-07	1.27817e-08
18090	3.81509e-07	2.21923e-08
16429	3.81557e-07	2.49864e-08
20292	3.81731e-07	9.43687e-09
16992	3.81978e-07	4.87473e-08
17189	3.8254e-07	5.18153e-08
21738	3.82761e-07	2.2955e-08
25648	3.82863e-07	1.40473e-08
19407	3.82907e-07	2.44362e-08
15764	3.82972e-07	1.75518e-08
15484	3.83006e-07	7.98655e-09
17052	3.83064e-07	7.11613e-09
17104	3.83067e-07	1.52399e-08
20372	3.83138e-07	8.89445e-09
20204	3.83509e-07	1.67261e-08
29862	3.83675e-07	2.75929e-08
28050	3.83826e-07	1.33552e-08
29242	3.83887e-07	1.81979e-08
16821	3.84069e-07	2.39194e-09
20391	3.8436e-07	3.8851e-08
13354	3.84814e-07	2.2516e-09
14972	3.85114e-07	4.55763e-09
10628	3.85207e-07	9.6699e-09
12472	3.85282e-07	7.07115e-09
22283	3.85415e-07	7.68531e-09
11771	3.85501e-07	4.37162e-08
18713	3.85541e-07	1.66229e-08
11344	3.8555e-07	9.74906e-10
10169	3.85564e-07	1.3491e-08
11147	3.85597e-07	2.45032e-08
10254	3.85698e-07	3.87797e-08
10084	3.85705e-07	6.59609e-09
14182	3.85831e-07	1.92859e-08
13200	3.86018e-07	2.99997e-08
22327	3.86128e-07	1.17885e-08
15775	3.8616e-07	1.68679e-08
10199	3.86278e-07	1.89079e-08
10125	3.86452e-07	1.28979e-07
16229	3.86626e-07	3.02602e-09
17102	3.86726e-07	9.16472e-09
24780	3.86833e-07	3.94514e-08
39138	3.86876e-07	8.16174e-08
21894	3.86971e-07	4.7579e-08
10480	3.87099e-07	9.8111e-09
25673	3.87166e-07	9.77239e-09
13673	3.8753e-07	3.51115e-08	putative neurosecretory
10059	3.87614e-07	1.32246e-09
24856	3.87633e-07	5.21368e-08
10740	3.87727e-07	3.74887e-08
18559	3.87839e-07	2.43524e-08
13884	3.87962e-07	2.75493e-08
13145	3.87998e-07	9.20757e-09
15552	3.88039e-07	2.52404e-08
25677	3.88158e-07	9.38471e-09
23665	3.88273e-07	9.5257e-09
11710	3.88419e-07	4.83838e-08
25442	3.88438e-07	1.05868e-07
18942	3.88501e-07	2.34708e-08
17347	3.88514e-07	1.7611e-08
16018	3.88593e-07	3.4585e-10
23210	3.8861e-07	8.62785e-08
17889	3.88709e-07	1.34312e-08
17874	3.88782e-07	1.94602e-10
23447	3.88981e-07	2.78674e-08
17608	3.89177e-07	1.1617e-08
15553	3.89461e-07	1.59525e-08
16811	3.8955e-07	2.47813e-08
21883	3.90118e-07	5.76516e-09
19488	3.9046e-07	1.53301e-08
14254	3.90478e-07	9.60388e-08	putative electrical
11406	3.90523e-07	4.44816e-09
26808	3.90555e-07	8.67511e-09
10303	3.90675e-07	8.83291e-09
14668	3.90909e-07	1.6982e-08
30261	3.9095e-07	3.16978e-08
20105	3.90989e-07	9.39665e-09
13135	3.91068e-07	1.81652e-08
10546	3.91203e-07	1.33742e-08
24373	3.9125e-07	3.19248e-08
22957	3.91253e-07	6.67861e-08
21200	3.91316e-07	4.41779e-08
16211	3.91349e-07	4.20121e-08
17849	3.9138e-07	4.50798e-08
11922	3.91431e-07	2.25418e-08
48422	3.91652e-07	4.42283e-08
11389	3.91677e-07	5.46243e-08
15087	3.91811e-07	2.3433e-08
15391	3.91833e-07	2.82868e-08
23359	3.91866e-07	9.37482e-08
10617	3.92021e-07	1.91939e-09
17800	3.9208e-07	3.08145e-08
17502	3.92359e-07	1.12021e-08
11385	3.92446e-07	7.99938e-09
29184	3.92474e-07	5.6572e-08
17546	3.92789e-07	7.04798e-09
17906	3.93071e-07	2.06176e-08
18273	3.93637e-07	4.75651e-08
17293	3.93834e-07	6.60578e-08
10853	3.93837e-07	1.85161e-08
12630	3.94032e-07	2.45477e-08
18828	3.94077e-07	4.73741e-09
21642	3.94105e-07	8.09548e-09
20321	3.94251e-07	2.17452e-08
14011	3.94252e-07	1.23656e-08
20727	3.94297e-07	2.65027e-08
19187	3.94642e-07	7.23313e-09
16481	3.94693e-07	2.93639e-08
10794	3.94702e-07	2.17738e-08
10062	3.94822e-07	3.98436e-08
22334	3.94829e-07	6.65629e-09
18175	3.94976e-07	9.30255e-09
16995	3.9512e-07	3.88234e-08
23829	3.953e-07	2.21253e-08
23906	3.95493e-07	9.78616e-08
26760	3.95517e-07	2.68129e-08
10472	3.95549e-07	1.81534e-08
30987	3.95632e-07	7.87073e-08
16247	3.96025e-07	1.18821e-08
14794	3.96146e-07	1.97946e-08
22059	3.9635e-07	3.71468e-08
30662	3.96946e-07	1.77125e-08
23893	3.96996e-07	4.54134e-08
19838	3.96998e-07	2.06002e-08
21040	3.97047e-07	1.77253e-08
22540	3.9713e-07	1.76408e-08
10186	3.97339e-07	5.60747e-08
25102	3.97343e-07	5.84042e-09
10196	3.97436e-07	1.43409e-08
24549	3.97467e-07	1.06092e-07
14552	3.97476e-07	1.73831e-08
25745	3.97487e-07	2.82938e-08
22822	3.97515e-07	4.19562e-08
16642	3.97534e-07	9.10569e-09
14795	3.97843e-07	5.05885e-09
29267	3.97883e-07	2.39187e-08
11126	3.97893e-07	1.14163e-07
19081	3.97959e-07	6.65599e-08
25340	3.98061e-07	5.14743e-08
12516	3.98206e-07	3.32075e-09
31435	3.9833e-07	2.88564e-08
25083	3.98445e-07	4.52817e-08
22813	3.98614e-07	8.99188e-09
10377	3.98648e-07	9.42903e-08
22603	3.98747e-07	1.01399e-08
32582	3.98763e-07	8.64557e-09
21730	3.98829e-07	3.90061e-08
18012	3.98842e-07	1.14575e-08
23000	3.99088e-07	2.08444e-08
20369	3.9914e-07	6.86486e-08
12420	3.99183e-07	2.8109e-09
16065	3.9925e-07	3.2712e-08
24551	3.99342e-07	3.2452e-08
14899	3.99409e-07	6.19067e-08
18973	3.99415e-07	4.58056e-08
18742	3.9944e-07	1.82113e-08
10600	3.99589e-07	1.14548e-09
15770	3.99703e-07	3.27634e-08
11950	3.99865e-07	2.74016e-08
17816	4.00062e-07	7.03473e-09
13944	4.0019e-07	1.88811e-08
15279	4.00447e-07	8.17932e-09
24255	4.00675e-07	2.69382e-08
14154	4.01011e-07	1.13201e-08
22776	4.01019e-07	4.92428e-08
26043	4.01032e-07	1.37624e-08
13873	4.0111e-07	1.5866e-08
15782	4.01225e-07	1.21148e-08
15836	4.01234e-07	2.75729e-08
10342	4.0142e-07	2.92499e-08
25750	4.01588e-07	1.38854e-07
19251	4.01618e-07	2.56512e-08
17198	4.01626e-07	4.97525e-08
21576	4.01627e-07	1.62966e-08
11166	4.0166e-07	1.17616e-08
17709	4.01667e-07	2.47152e-08
18548	4.01676e-07	5.33825e-09
15608	4.01727e-07	5.20737e-08
24791	4.02171e-07	3.43117e-08
26036	4.02313e-07	1.08577e-09
14895	4.02352e-07	7.83003e-09
17998	4.02542e-07	3.63949e-08
11146	4.02639e-07	5.22453e-08
18838	4.02706e-07	2.36173e-08
12480	4.02711e-07	6.58178e-09
10051	4.02737e-07	1.58589e-08
35488	4.0291e-07	1.6112e-08
10693	4.03174e-07	7.48955e-09
19623	4.03253e-07	9.01639e-09
21300	4.03278e-07	6.98391e-08
21635	4.03396e-07	2.57332e-08
21994	4.03582e-07	9.23243e-09
13209	4.03728e-07	2.17978e-10
19741	4.03779e-07	1.24351e-08
11140	4.03791e-07	2.07811e-09
24016	4.0385e-07	2.88087e-08
26685	4.03875e-07	1.3343e-09
10349	4.03886e-07	1.03926e-08
12219	4.03903e-07	8.8575e-08
16231	4.03907e-07	2.79617e-08
25533	4.04038e-07	3.53371e-09
27064	4.04227e-07	7.44153e-08	NA, putative electrical
25760	4.04227e-07	2.39219e-09
13116	4.04248e-07	5.78414e-09
30827	4.0431e-07	4.15677e-08
21218	4.04407e-07	3.22984e-08
17909	4.04626e-07	7.09167e-09
23340	4.0466e-07	2.05641e-09
22469	4.04699e-07	8.93918e-09
160145	4.04889e-07	2.56238e-08
20790	4.04898e-07	1.40271e-08
24435	4.04921e-07	1.5398e-07
13518	4.04988e-07	3.19261e-08
12671	4.05042e-07	2.07925e-08
20005	4.0516e-07	5.84941e-09
23901	4.05225e-07
16426	4.05348e-07	3.05661e-08
152294	4.0575e-07	3.63561e-08
14908	4.05815e-07	5.12031e-08
26230	4.05834e-07	7.3322e-08
19055	4.05846e-07	1.31837e-07
12281	4.05852e-07	1.14866e-08
18792	4.05913e-07	2.82252e-08
157219	4.05933e-07	1.70578e-08
29274	4.05968e-07	8.77258e-08
16985	4.06025e-07	4.39582e-09
13851	4.06074e-07	1.52793e-08
21066	4.06163e-07	3.66127e-08
17538	4.06316e-07	2.00892e-09
36342	4.06656e-07	1.59961e-08
24591	4.06849e-07	6.1297e-08
23739	4.07089e-07	3.21821e-08
11060	4.07256e-07	2.31506e-08
13694	4.07317e-07	2.42732e-07
22858	4.07407e-07	1.27866e-09
24009	4.07461e-07	1.39651e-07
20411	4.07467e-07	1.89289e-08
12200	4.0748e-07	9.38461e-09
18349	4.07543e-07	4.44751e-08
22825	4.07643e-07	3.81576e-08
10682	4.0775e-07	2.95174e-08
16342	4.0783e-07	2.5377e-08
27979	4.07877e-07	2.2408e-08
20417	4.07968e-07	2.54192e-08
31939	4.08092e-07	8.55455e-09
21287	4.08102e-07	4.37428e-08
15322	4.0831e-07	6.36503e-08
15051	4.08363e-07	9.56837e-09
10237	4.08485e-07	1.93406e-08
11669	4.08569e-07	1.64373e-08
15666	4.08592e-07	4.2331e-08
11841	4.08873e-07	1.60687e-08
24076	4.08888e-07	2.33668e-08
12660	4.0909e-07	4.82613e-08
13460	4.09356e-07	4.62553e-09
16217	4.09366e-07	3.96147e-09
17810	4.09422e-07	3.20052e-08
11953	4.09478e-07	2.26906e-10
27161	4.09556e-07	5.95668e-09
19853	4.09608e-07	4.42848e-08
15270	4.09637e-07	3.28553e-08
13910	4.09992e-07	9.55278e-09
19373	4.10001e-07	5.03576e-08
10343	4.1043e-07	7.60272e-08
11163	4.10618e-07	2.75035e-08
10984	4.10689e-07	9.95516e-09
21534	4.10974e-07	3.29746e-08
18481	4.1104e-07	2.01237e-08
17101	4.11076e-07	5.98124e-09
19077	4.11094e-07	3.77978e-08
16709	4.1115e-07	1.21474e-07	putative neurosecretory
11297	4.11196e-07	9.18376e-08
10854	4.11381e-07	9.53373e-09
23582	4.11436e-07	3.7244e-08
14132	4.1163e-07	5.58496e-08
15501	4.11648e-07	6.95975e-08
20642	4.11726e-07	4.21307e-08
18095	4.11738e-07	7.61322e-09
16828	4.12017e-07	6.44189e-08
13577	4.12033e-07	3.9443e-08
153866	4.12117e-07	5.69017e-09
21794	4.12294e-07	7.93212e-08
11890	4.12297e-07	4.79444e-09
27394	4.12298e-07	1.9911e-08
16038	4.12304e-07	2.26549e-08
17375	4.12406e-07	2.35169e-09
14958	4.12519e-07	9.74424e-08
10310	4.12562e-07	1.25337e-09
15859	4.12589e-07	2.65253e-08
13654	4.12863e-07	3.65415e-08
20826	4.12967e-07	6.86829e-09
29464	4.13159e-07	3.58994e-08
19869	4.13386e-07	8.1575e-08
14811	4.13423e-07	9.15868e-09
13680	4.13666e-07	2.88438e-08
27370	4.13689e-07	1.19826e-08
22888	4.13779e-07	1.94986e-08
11671	4.1422e-07	1.14044e-08
10198	4.1428e-07	7.7741e-09
10297	4.14482e-07	2.32365e-09
11609	4.14502e-07	6.67617e-09
15432	4.14502e-07	2.09324e-08
13406	4.14507e-07	1.88845e-08
21258	4.14741e-07	1.06109e-08
14715	4.1477e-07	2.9336e-08
15154	4.14798e-07	2.00553e-08
17339	4.14833e-07	6.61317e-08
13570	4.14843e-07	1.25384e-08
15404	4.15096e-07	4.59646e-08
14380	4.151e-07	9.79996e-09
26341	4.1511e-07	8.86446e-08
10913	4.15268e-07	9.6507e-10
31870	4.1527e-07	1.62096e-08
23860	4.15302e-07	3.36268e-08
15798	4.15431e-07	3.02699e-08
15970	4.15436e-07	8.96634e-08
18611	4.15443e-07	5.57938e-08
17462	4.15883e-07	4.11448e-08
24884	4.15976e-07	3.30793e-08
11438	4.16e-07	1.58618e-08
17814	4.16103e-07	2.27124e-08
29758	4.1614e-07	3.21872e-08
20438	4.16207e-07	2.27882e-08
16081	4.16296e-07	3.28626e-08
20400	4.16403e-07	2.19465e-08
16872	4.16459e-07	4.0521e-08
24440	4.16695e-07	1.37018e-08
23104	4.16786e-07	5.74305e-09
11008	4.16885e-07	1.1875e-08
24314	4.17206e-07	8.85054e-09
22842	4.17274e-07	5.72986e-08
15022	4.17294e-07	1.7536e-08
25901	4.1737e-07	7.93427e-09
29421	4.17512e-07	3.56381e-08
15537	4.17577e-07	3.42307e-08
25339	4.17589e-07	1.95925e-08
12786	4.17614e-07	2.21885e-08
23483	4.17671e-07	8.78983e-09
23183	4.17776e-07	3.18369e-08
21187	4.17885e-07	4.17806e-09
13111	4.17972e-07	3.75432e-09
10714	4.18308e-07	1.44007e-08
16699	4.18321e-07	4.81119e-07
31216	4.1834e-07	8.8922e-09
15110	4.18387e-07	2.66881e-08
16515	4.1875e-07	1.27275e-08
22648	4.1882e-07	5.35e-08
17683	4.19324e-07	2.73266e-08
26034	4.19408e-07	1.8467e-08
17856	4.19445e-07	5.49708e-10
30140	4.19448e-07	4.08695e-08
10768	4.19542e-07	1.67233e-08
14661	4.19578e-07	2.46887e-08
20949	4.19693e-07	9.38655e-11
15054	4.19891e-07	2.664e-08
11340	4.19941e-07	2.84766e-09
15673	4.20011e-07	2.20706e-08
21903	4.20175e-07	4.10002e-08
25930	4.20324e-07	1.1184e-08
19403	4.20338e-07	7.10918e-09
10332	4.2051e-07	3.58683e-08
12190	4.20585e-07	8.68315e-10
18067	4.20711e-07	1.73062e-08
21062	4.20745e-07	4.28775e-08
21740	4.20747e-07	5.73528e-09
10539	4.20854e-07	1.32476e-08
22934	4.2087e-07	3.85008e-08
10363	4.21155e-07	3.8068e-10
24126	4.21257e-07	9.34958e-09
18377	4.21373e-07	3.72068e-08
16428	4.21404e-07	2.58633e-08
17979	4.21444e-07	7.974e-08
21938	4.21492e-07	1.44925e-08
16662	4.21504e-07	2.1753e-08
12233	4.21878e-07	1.02439e-08
21595	4.21981e-07	1.99574e-08
18223	4.2205e-07	5.05495e-08
15547	4.22392e-07	1.86281e-08
19745	4.22527e-07	5.92159e-11
23278	4.22533e-07	4.25755e-08
20515	4.22629e-07	2.47854e-08
27400	4.2263e-07	9.87612e-09
20483	4.22933e-07	2.83583e-08
10153	4.2307e-07	8.89857e-08
27033	4.23282e-07	1.10523e-07
20547	4.23349e-07	1.30413e-08
21998	4.23406e-07	2.63531e-08
14605	4.23642e-07
20036	4.23722e-07	6.98718e-09
20931	4.23902e-07	2.94333e-08
24416	4.24026e-07	2.17986e-08
13427	4.24166e-07	2.19669e-08
11214	4.24269e-07	6.49209e-09
11139	4.24308e-07	5.99269e-09
17065	4.24745e-07	1.99446e-08
23868	4.24745e-07	7.14675e-09
11315	4.24775e-07	8.20969e-09
15727	4.24811e-07	3.23182e-09
28985	4.2495e-07	4.091e-08
12105	4.24955e-07	2.45008e-08
20368	4.25217e-07	4.4114e-09
20322	4.25243e-07	2.73854e-08
23921	4.25254e-07	3.0156e-08
20691	4.25395e-07	2.00884e-09
26472	4.25432e-07	3.3599e-08
23519	4.2544e-07	2.55054e-08
24980	4.25502e-07	2.13263e-09
15465	4.25617e-07	2.45242e-08
12515	4.25848e-07	1.43607e-08
18558	4.25897e-07	2.2361e-08
16530	4.25922e-07	2.28269e-08
19507	4.26026e-07	1.10501e-08
21872	4.26131e-07	3.86909e-08
18622	4.26138e-07	9.10269e-08
15583	4.26215e-07	3.29982e-08
10214	4.26218e-07	3.04389e-10
11247	4.26306e-07	1.46749e-08
21054	4.26335e-07	1.14055e-08
10765	4.26422e-07	1.94911e-08
11730	4.26636e-07	1.20157e-08
21332	4.26776e-07	1.6044e-08
10365	4.26851e-07	4.1683e-08
25958	4.26855e-07	1.01913e-08
22233	4.26936e-07	9.3368e-09
12595	4.26953e-07	3.21122e-08
12443	4.27076e-07	2.20882e-08
18555	4.27125e-07	1.62366e-08
12120	4.27277e-07	4.91687e-09
11129	4.27332e-07	1.6165e-08
21785	4.27481e-07	4.80154e-08
25795	4.27521e-07	3.75502e-09
10085	4.27532e-07	3.41221e-09
21586	4.27656e-07	1.64051e-08
19648	4.27678e-07	4.11335e-08
11709	4.27724e-07	2.14242e-08
21098	4.27789e-07	2.36784e-09
23946	4.27791e-07	4.02748e-08
21494	4.27852e-07	1.88956e-08
13880	4.27906e-07	1.09446e-08
16619	4.27996e-07	2.19321e-08
14428	4.28079e-07	4.97307e-08
16826	4.28162e-07	4.80861e-08	putative electrical
13252	4.28221e-07	5.48836e-08
22552	4.283e-07	3.09695e-08
20287	4.28397e-07	6.87902e-09
23275	4.28405e-07	3.07117e-08
21544	4.28471e-07	1.05128e-08
19546	4.28527e-07	8.86863e-08
22935	4.28534e-07	3.98664e-08
16977	4.29002e-07	1.84424e-08
17650	4.29057e-07	2.21796e-08
22507	4.29067e-07	1.99943e-08
24041	4.29485e-07	4.25692e-08
10837	4.29538e-07	4.23382e-08
18361	4.29592e-07	1.5654e-08
14866	4.29727e-07	2.5821e-08
11696	4.30012e-07	5.1013e-09
31424	4.30067e-07	3.1437e-08
13078	4.30087e-07	1.79784e-08
10242	4.30111e-07	3.22449e-08
20901	4.30113e-07	5.03107e-08
11062	4.30334e-07	9.5783e-09
11452	4.30405e-07	8.7641e-09
23719	4.3041e-07	8.13272e-09
19180	4.30421e-07	2.96414e-08	putative neurosecretory
14987	4.3044e-07	9.46002e-09
27684	4.30575e-07	5.65079e-09
15743	4.30599e-07	9.8658e-09
11194	4.30775e-07	4.25279e-09
11817	4.30842e-07	9.62502e-09
22082	4.31048e-07	2.84215e-09
22979	4.3114e-07	1.87759e-09
22789	4.3116e-07	3.92241e-08
10996	4.31312e-07	7.71689e-09
16183	4.31397e-07	4.66648e-08
16047	4.31615e-07	3.37406e-08
11736	4.31636e-07	1.77081e-08
28047	4.31799e-07	9.95811e-09
18317	4.31945e-07	1.26687e-08
15237	4.32059e-07	1.96686e-08
13320	4.32117e-07	7.7825e-09
18654	4.32292e-07	5.30563e-09
15153	4.32336e-07	7.91102e-09
26074	4.32496e-07	8.66686e-08
11744	4.32508e-07	1.1463e-08
20998	4.32532e-07	6.17152e-08
22225	4.32597e-07	1.77077e-09
13104	4.32669e-07	2.71101e-08
28316	4.32879e-07	1.42555e-08
16158	4.32955e-07	3.21631e-08
23472	4.33007e-07	2.14899e-08
17297	4.33072e-07	1.95454e-08
20210	4.33074e-07	6.06677e-08
15447	4.33181e-07	5.80288e-09
11100	4.33298e-07	6.51506e-09
10990	4.33303e-07	1.15547e-09
17066	4.33525e-07	3.02782e-08
17780	4.33753e-07	3.22618e-09
10513	4.33885e-07	7.56239e-09
17368	4.33975e-07	3.05065e-08
10019	4.3418e-07	3.58672e-08
17130	4.34304e-07	5.86378e-09
14283	4.34627e-07	4.06572e-08
18163	4.34647e-07	2.80037e-08
12119	4.34691e-07	1.13377e-08
11367	4.3485e-07	1.60851e-08
13838	4.34861e-07	2.04882e-08
13722	4.34863e-07	4.8768e-08
19947	4.35109e-07
13827	4.35158e-07	2.97e-08
11128	4.3531e-07	3.52943e-08
10551	4.35321e-07	2.92713e-09
27211	4.35334e-07	1.97852e-08
12651	4.35402e-07	2.74267e-08
27191	4.35464e-07	3.6304e-08
23025	4.35636e-07	4.20513e-08
25950	4.36234e-07	4.8444e-08
18342	4.36404e-07	7.10594e-09
11009	4.36597e-07	5.3549e-09
10799	4.36813e-07	7.83981e-09
24649	4.36971e-07	5.43028e-08
15392	4.36979e-07	7.0374e-09
29185	4.37e-07	4.66398e-08
14763	4.37187e-07	5.65553e-09
19600	4.37382e-07	3.87891e-09
14793	4.37419e-07	4.72639e-08
19466	4.37673e-07	3.51665e-08
20413	4.3769e-07	1.61096e-08
14478	4.37747e-07	5.19177e-08
19808	4.37753e-07	1.99674e-09
10104	4.37792e-07	6.99799e-09	putative neurosecretory
19409	4.37918e-07	7.62283e-09
11631	4.37935e-07	1.20934e-08
21051	4.37993e-07	1.1573e-07
10075	4.38087e-07	8.78206e-09
23346	4.38118e-07	5.29183e-08
25100	4.38302e-07	1.94531e-08
19884	4.38324e-07	1.50644e-08
16708	4.38336e-07	3.04442e-09
13315	4.38397e-07	1.56045e-08
25434	4.38409e-07	3.24075e-08
21107	4.38691e-07	4.67576e-09
26224	4.38714e-07	5.54111e-08
24404	4.38902e-07	1.98541e-08
157197	4.38964e-07	1.21981e-08
28103	4.3897e-07	5.35601e-08
22156	4.38999e-07	3.7755e-08
27137	4.39323e-07	2.779e-08
11191	4.39366e-07	1.02039e-10
20681	4.39469e-07	1.32318e-08
14144	4.39476e-07	3.67208e-09
22969	4.39527e-07	2.33467e-08
17820	4.39626e-07	1.16371e-08
12023	4.39712e-07	3.91295e-08
25741	4.39859e-07	2.50488e-08
27499	4.39882e-07	1.17127e-08
23317	4.39959e-07	3.54751e-08
17404	4.40006e-07	1.67526e-08
20731	4.40018e-07	2.77223e-07
25576	4.4008e-07	1.16672e-08
10918	4.40257e-07	6.8543e-08
16457	4.40497e-07	2.22542e-08
23492	4.40627e-07	9.15911e-09
20973	4.40723e-07	6.43222e-08
18758	4.40798e-07	3.36388e-08
23566	4.41087e-07	1.61428e-08
21429	4.41232e-07	2.81754e-08
18884	4.41274e-07	1.29069e-07
22062	4.41311e-07	3.04596e-08
26944	4.41537e-07	2.37355e-08
12896	4.41647e-07	1.59133e-08
14528	4.41737e-07	1.02774e-08
11319	4.41794e-07	1.46103e-08
14217	4.41839e-07	2.0051e-08
21244	4.4188e-07	7.77458e-09
16983	4.41939e-07	1.99865e-08
11577	4.41971e-07	1.12559e-08
22685	4.41982e-07	1.28959e-08
13245	4.42085e-07	2.178e-08
26442	4.42107e-07	3.70838e-08
11258	4.42133e-07	7.32164e-10
14705	4.42327e-07	8.00028e-08
11293	4.42366e-07	4.82283e-08
22993	4.42446e-07	3.04585e-09
18639	4.42478e-07	3.06212e-08
36367	4.4267e-07	1.50907e-07
24023	4.42846e-07	1.78729e-08
12793	4.42882e-07	3.56519e-09
23861	4.43006e-07	2.58592e-09
10252	4.43126e-07	2.29034e-08
14567	4.43149e-07	6.25628e-08
16957	4.43159e-07	1.10428e-08
25513	4.43168e-07	1.8617e-08
22980	4.43176e-07	3.93754e-08
17264	4.4319e-07	3.33471e-08
15282	4.43221e-07	2.12946e-08
15688	4.43274e-07	2.78196e-08
21656	4.43449e-07	7.2591e-08
18605	4.43607e-07	4.47278e-10
23821	4.44068e-07	3.26747e-09
16508	4.44073e-07	2.52403e-08
26815	4.44181e-07	6.89919e-08
11289	4.442e-07	3.18297e-08
16152	4.44277e-07	1.36244e-07
20479	4.44541e-07	2.24488e-08
33194	4.44545e-07	3.86413e-08
16310	4.44642e-07	1.97333e-08
22344	4.4471e-07	2.12508e-08
16755	4.44748e-07	3.21753e-08
18136	4.4477e-07	4.17636e-08
22985	4.44894e-07	4.29388e-08
15653	4.45068e-07	1.49535e-08
32248	4.45117e-07	8.74451e-08
10127	4.4517e-07	1.15532e-09
12527	4.453e-07	3.43194e-09
15082	4.45302e-07	2.57411e-08
27944	4.45364e-07	1.30444e-08
12437	4.45557e-07	5.69963e-08
21562	4.46002e-07	1.56825e-08
13686	4.4609e-07	2.143e-08
17563	4.46158e-07	1.98936e-08
24941	4.46166e-07	2.59278e-09
16549	4.46337e-07	1.26653e-08
13019	4.46436e-07	6.31139e-08
25908	4.46622e-07	1.40152e-08
13440	4.46727e-07	2.30101e-08
12645	4.4684e-07	4.05498e-08
25364	4.47101e-07	8.47373e-09
10955	4.47787e-07	9.19681e-09
16450	4.47835e-07	2.66061e-08
22339	4.47898e-07	2.00745e-08
20775	4.48016e-07	1.5482e-08
10994	4.48048e-07	1.06347e-08
12247	4.48071e-07	1.22454e-08
22301	4.48159e-07	3.12512e-09
31864	4.4853e-07	2.21613e-08
32054	4.48763e-07	1.83541e-08
14325	4.48769e-07	2.1181e-08
10935	4.48801e-07	6.92335e-09
21837	4.48868e-07	5.99322e-08
18829	4.48978e-07	6.20334e-08
20599	4.49079e-07	1.39825e-08
14143	4.49194e-07	3.80163e-08
11348	4.49518e-07	2.77078e-08
16971	4.49532e-07	6.56165e-08
24807	4.49608e-07	3.76248e-08
24729	4.49647e-07	5.98261e-08
14808	4.49649e-07	2.90337e-08
20203	4.49655e-07	1.8599e-08
100793	4.49657e-07	1.71925e-08
22781	4.49724e-07	4.91623e-08
14582	4.49752e-07	1.38395e-08
19193	4.49964e-07	1.89555e-08
12128	4.49989e-07	2.27109e-08
11027	4.5e-07	1.00506e-08
16943	4.50057e-07	3.01665e-10
26082	4.50288e-07	6.81755e-08
20844	4.50518e-07	2.55706e-08
28676	4.50601e-07	1.00219e-08
23627	4.50611e-07	4.32147e-08
22073	4.5063e-07	3.65814e-09
14232	4.50678e-07	2.05555e-09
12354	4.50833e-07	2.78759e-08
16592	4.5089e-07	1.30266e-08
26460	4.50975e-07	1.89778e-08
24299	4.50986e-07	1.6495e-08
10926	4.50988e-07	1.89187e-08
14989	4.5108e-07	6.18131e-09
21475	4.51117e-07	5.93112e-08
26742	4.51126e-07	6.48299e-08
16141	4.51183e-07	7.3917e-09
19849	4.51236e-07	1.08376e-08
13798	4.51297e-07	2.84857e-08
23740	4.51338e-07	2.26359e-08
13124	4.51359e-07	4.9344e-08
19984	4.51377e-07	1.75795e-08
20986	4.51543e-07	4.13726e-08
21093	4.51568e-07	3.59425e-08
25945	4.5161e-07	4.01885e-08
27201	4.5161e-07	9.67135e-09
14823	4.51906e-07	2.92067e-09
25464	4.51953e-07	5.71862e-09
17107	4.52003e-07	2.03876e-08
10083	4.52048e-07	2.38086e-08	putative neurosecretory
18741	4.52189e-07	6.8664e-08
23216	4.5222e-07	6.67161e-09
10263	4.52226e-07	1.30715e-08
11337	4.52267e-07	2.47048e-08
10504	4.5275e-07	5.65182e-08
22887	4.53015e-07	4.89966e-09
30470	4.53352e-07	9.51266e-08
10978	4.53448e-07	1.66271e-08
23049	4.5349e-07	1.27087e-08
22588	4.53507e-07	2.33761e-08
17757	4.53592e-07	5.2012e-08
20201	4.53615e-07	4.8625e-08
28020	4.53644e-07	4.3547e-08
19875	4.53961e-07	3.38701e-09
26970	4.54109e-07	3.34423e-08
22751	4.54155e-07	7.20039e-09
20266	4.54237e-07	5.90192e-08
12475	4.54362e-07	1.44314e-10
11093	4.54379e-07	8.24756e-09
33722	4.5445e-07	6.06301e-08
16307	4.54546e-07	2.5121e-08
10631	4.54585e-07	1.12395e-08
29250	4.54636e-07	2.42519e-08
18927	4.54728e-07	8.40335e-08
24418	4.5476e-07	1.31681e-07
17940	4.54801e-07	1.94738e-09
13506	4.54829e-07	2.73656e-08
13310	4.5489e-07	1.99529e-08
20175	4.54922e-07	5.89178e-09
31215	4.55016e-07	5.57505e-08
11586	4.55138e-07	2.31255e-08
11836	4.55242e-07	3.27276e-08
10439	4.55311e-07	2.88061e-09
18460	4.55479e-07	2.92406e-08
22716	4.55606e-07	2.99698e-08
13565	4.55644e-07
20147	4.55864e-07	6.30361e-08
12634	4.55917e-07	8.64441e-08
24484	4.56023e-07	1.01653e-08
20495	4.561e-07	3.90915e-08
16422	4.56141e-07	3.29107e-08
15308	4.56284e-07	8.9878e-08
20007	4.56427e-07	9.4874e-09
23654	4.56541e-07	6.91251e-09
16710	4.56625e-07	3.4363e-08
10553	4.5682e-07	5.6397e-09
25021	4.56868e-07	3.32831e-08
16940	4.5696e-07	7.65306e-08
20291	4.56966e-07	1.85942e-08
18603	4.56982e-07	5.17142e-08
14583	4.57087e-07	1.3503e-08
17171	4.571e-07	4.2166e-08
25445	4.57121e-07	1.65115e-08
24541	4.5714e-07	4.32282e-08
23982	4.57214e-07	2.33554e-08
10979	4.57247e-07	1.56481e-10
19236	4.57444e-07	9.19664e-08
26016	4.57502e-07	4.67673e-08
12073	4.57687e-07	7.25962e-09
19321	4.57701e-07	3.38455e-08
10235	4.57875e-07	8.51303e-08
15698	4.57943e-07	5.86992e-09
41622	4.58075e-07	1.08454e-07
15802	4.58149e-07	1.72419e-08
13948	4.58303e-07	2.26727e-08
11722	4.58369e-07	6.11878e-10
11531	4.58388e-07	4.468e-10
19008	4.58461e-07	9.21113e-08
25221	4.58564e-07	1.46239e-08
10321	4.58623e-07	3.18483e-08
10590	4.58698e-07	2.31042e-09
20481	4.59078e-07	1.92511e-08
12140	4.59088e-07	4.96407e-08
24244	4.59224e-07	4.41404e-08
21185	4.59259e-07	4.56621e-08
25655	4.59309e-07	1.05175e-08
10402	4.59375e-07	5.73937e-09
11156	4.5945e-07	1.81288e-08
20785	4.59547e-07	1.40993e-08
24524	4.59605e-07	5.76178e-09
24586	4.59671e-07	3.34973e-08
15987	4.59708e-07	1.80758e-09
17982	4.59775e-07	2.96331e-08
13100	4.59825e-07	2.09587e-08
21796	4.59835e-07	1.81975e-08
16759	4.59855e-07	1.00874e-08
10431	4.59884e-07	8.7473e-09
30300	4.59888e-07	5.97643e-10
11955	4.60046e-07	1.0001e-08
14057	4.6013e-07	1.27226e-08
24005	4.60263e-07	2.79264e-08
25046	4.60314e-07	3.12692e-08
28688	4.60348e-07	1.90529e-08
16717	4.60387e-07	3.26977e-09
19728	4.60507e-07	4.0123e-08
22257	4.60595e-07	1.19087e-08
25974	4.60651e-07	1.78875e-08
10430	4.60811e-07	1.11442e-08
25690	4.60831e-07	5.36182e-08
26956	4.60832e-07	2.1082e-09
11040	4.6087e-07	1.06148e-08
17092	4.60897e-07	9.00189e-08
15097	4.6109e-07	8.6855e-08
20340	4.61199e-07	3.88123e-08
18753	4.61303e-07	1.218e-08
15283	4.61365e-07	2.56193e-08
22764	4.61399e-07	1.01006e-08
19015	4.61443e-07	2.20751e-08
11494	4.61529e-07	2.01737e-08
19322	4.61548e-07	4.74543e-08
27116	4.61583e-07	8.12208e-08
29096	4.61636e-07	2.45789e-08
21559	4.61692e-07	1.10495e-08
15767	4.61767e-07	9.38131e-09
12151	4.61845e-07	2.75036e-09
24593	4.61858e-07	2.1951e-08
11797	4.6189e-07	8.20623e-09
19696	4.61987e-07	2.58671e-08
10395	4.61989e-07	1.30128e-08
27094	4.62181e-07	5.78694e-08
28605	4.62497e-07	5.0511e-08
20100	4.62557e-07	2.29469e-08
26220	4.62575e-07	3.72223e-08
22496	4.62603e-07	5.15929e-08
23080	4.62604e-07	7.57828e-08
17341	4.62799e-07	3.11818e-08
18382	4.62811e-07	3.50057e-08
18016	4.62942e-07	3.93136e-08
22003	4.62956e-07	2.18206e-08
20066	4.63022e-07	2.71238e-08
18762	4.6303e-07	8.1752e-08
21805	4.63034e-07	3.49432e-08
15541	4.63036e-07	3.2451e-08
15668	4.63042e-07	2.78042e-08
13154	4.63255e-07	6.71761e-08
27980	4.63261e-07	9.62235e-08
11412	4.63417e-07	4.82033e-09
19454	4.63483e-07	2.273e-08
10184	4.63799e-07	1.30975e-07
21364	4.63908e-07	2.67544e-08
14421	4.63934e-07	1.79988e-08
20272	4.64025e-07	5.28102e-10
27380	4.6409e-07	7.37775e-10
11941	4.6413e-07	4.95134e-08
22671	4.64426e-07	7.4988e-08
17670	4.64482e-07	6.53859e-08
13591	4.64493e-07	6.7594e-08
22246	4.64594e-07	2.41383e-08
27179	4.6469e-07	1.73868e-08
12345	4.64697e-07
10267	4.64946e-07	1.50624e-08
14430	4.65063e-07	2.08932e-08
15542	4.65147e-07	1.45022e-08
22326	4.65187e-07	1.71768e-08
16302	4.65198e-07	1.35332e-08
11769	4.653e-07	3.5908e-09
24544	4.65433e-07	1.19509e-08
16271	4.65522e-07	4.44257e-08
27668	4.65685e-07	6.20107e-08
13220	4.65695e-07	1.78394e-08
19863	4.65742e-07	5.15932e-08
22256	4.65807e-07	1.36127e-08
14534	4.65872e-07	3.17374e-08
17959	4.65873e-07	2.27595e-08
22408	4.6603e-07	2.25496e-08
28493	4.66116e-07	1.0727e-08
13437	4.66214e-07	1.30935e-08
18984	4.66226e-07	8.81697e-08
15252	4.66326e-07	2.75725e-08
18328	4.66362e-07	4.77772e-08
23178	4.66487e-07	1.79047e-09
11425	4.66497e-07	1.48269e-10
26583	4.66559e-07	6.65988e-09
17200	4.66692e-07	2.80509e-08
28354	4.66829e-07	2.66049e-08
22851	4.66888e-07	1.35353e-08
18552	4.66951e-07	9.61895e-08
11636	4.67086e-07	4.66772e-08
15217	4.67088e-07	2.96563e-08
26458	4.67141e-07	4.6695e-09
10484	4.67312e-07	1.61816e-08
19593	4.67361e-07	1.21519e-08
21206	4.67362e-07	3.08021e-08
26212	4.67428e-07	4.56015e-08
17492	4.67437e-07	4.13569e-08
20491	4.6744e-07	2.58817e-08
25821	4.67517e-07	2.12665e-08
19881	4.67702e-07	2.99188e-08
14250	4.67761e-07	9.65794e-08
20354	4.67953e-07	2.77258e-08
20930	4.68036e-07	3.50581e-09
16134	4.68148e-07	2.0645e-08
26116	4.68165e-07	2.68931e-08
17115	4.68182e-07	1.98569e-08
155337	4.68442e-07	4.55059e-08
22332	4.68568e-07	3.93279e-08
11792	4.68639e-07	1.4372e-08
21573	4.68644e-07	5.97775e-09
14657	4.68891e-07	3.68281e-08
54898	4.68897e-07	3.11859e-08
19651	4.69025e-07	7.77355e-08
21744	4.69102e-07	3.72629e-08
22618	4.69163e-07	1.11913e-08
23226	4.69194e-07	2.84819e-08
13060	4.69396e-07	3.55704e-08
17280	4.69453e-07	3.7582e-08
24786	4.6964e-07	4.4989e-08
15520	4.69641e-07	8.92402e-08
15640	4.69688e-07	1.8308e-08
10168	4.69723e-07	1.4741e-08
22876	4.69746e-07	2.77759e-10
18561	4.69996e-07	3.11292e-08
13852	4.7e-07	1.74906e-08
19186	4.70057e-07	1.51653e-07
14059	4.70108e-07	3.84235e-08
26475	4.70176e-07	5.26338e-08
14135	4.70213e-07	2.81503e-08
27397	4.70241e-07	3.58821e-08
11550	4.70281e-07	4.71229e-08
15655	4.70303e-07	2.13444e-08
15418	4.70584e-07	6.50618e-08
100546	4.70585e-07	1.28747e-08
10066	4.70587e-07	3.04974e-08
15061	4.70615e-07	4.89475e-08
18218	4.7062e-07	5.61453e-09
12367	4.70909e-07	9.83945e-09
10691	4.71025e-07	2.11714e-08
10923	4.71036e-07	1.29019e-08
15598	4.71074e-07	2.53967e-08
15311	4.71114e-07	2.8217e-08
15877	4.71181e-07	8.00013e-09
21222	4.71193e-07	1.24609e-08
30644	4.71315e-07	5.51423e-08
10661	4.7132e-07	1.84309e-08
22689	4.71474e-07	4.61768e-09
27908	4.71597e-07	1.32219e-07
102021	4.71669e-07	6.20468e-08
14833	4.71743e-07	1.24331e-08
21838	4.71795e-07	1.95802e-08
21551	4.71921e-07	1.79806e-08
23643	4.71953e-07	3.27421e-08
20138	4.72015e-07	5.67563e-09
20800	4.72178e-07	2.2081e-08
21492	4.72247e-07	1.60925e-07
20118	4.72262e-07	2.05187e-08
25675	4.72555e-07	3.57514e-08
22195	4.72566e-07	4.11757e-08
21407	4.72604e-07	9.39046e-09
10324	4.72611e-07	1.85961e-08
20056	4.7263e-07	9.00647e-09
11492	4.72659e-07	1.2201e-10
14243	4.72698e-07	9.59936e-09
11467	4.72724e-07	7.72558e-09
17048	4.72739e-07	4.1445e-09
14481	4.72787e-07	5.30424e-08
10860	4.72796e-07		putative neurosecretory
23474	4.72973e-07	1.04185e-08
13625	4.72983e-07	7.51334e-09
23495	4.73052e-07	4.87641e-08
10348	4.73108e-07	7.16366e-09
10601	4.73256e-07	2.52696e-08
12241	4.73387e-07	4.1755e-09
25759	4.73477e-07	3.67778e-08
10930	4.73509e-07	2.68885e-09
14388	4.73607e-07	2.19842e-09
12648	4.73615e-07	1.26525e-08
10593	4.73898e-07	1.49041e-08
22474	4.73946e-07	1.98277e-08
15234	4.73975e-07	7.60187e-09
14060	4.74162e-07	2.28695e-08
11717	4.74235e-07	9.06717e-09
23541	4.74238e-07	1.85523e-08
12412	4.74359e-07	8.27583e-09
21195	4.74552e-07	1.38541e-09
18800	4.74656e-07	9.4165e-08
15250	4.74699e-07	8.48118e-09
24505	4.74878e-07	1.20599e-08
19242	4.74904e-07	3.11495e-09
20603	4.75132e-07	1.41353e-08
19512	4.75235e-07	2.56631e-08
14758	4.75265e-07	1.48253e-08
19798	4.75343e-07	7.36396e-09
15338	4.75353e-07	1.68245e-08
22063	4.75403e-07	4.85189e-08
30416	4.75427e-07	3.82086e-08
20571	4.75552e-07	3.07433e-08
18994	4.75554e-07	7.20415e-08
16064	4.75604e-07	1.36786e-08
10588	4.75694e-07	1.96861e-11
17454	4.75798e-07	2.38077e-08
25488	4.75904e-07	1.87106e-08
11031	4.76063e-07	2.25815e-09
10911	4.76075e-07	3.69192e-09
25008	4.76094e-07	4.42863e-08
157582	4.76139e-07	8.57831e-09	putative neurosecretory
11382	4.7616e-07	1.12247e-09
14720	4.76245e-07	5.12508e-09
18330	4.76418e-07	2.14129e-08
15001	4.76533e-07	1.0352e-08
11940	4.7659e-07	7.73148e-09
16003	4.76665e-07	6.42501e-09
10215	4.76721e-07	1.29373e-08
13119	4.76729e-07	2.54709e-08
154119	4.77036e-07	2.125e-09
19780	4.7711e-07	1.52801e-08
29480	4.77338e-07	7.13432e-08
25125	4.7739e-07	5.0768e-08
11843	4.77466e-07	3.85894e-08
19768	4.77696e-07	2.73237e-08
33524	4.77748e-07	9.79883e-08
11077	4.77862e-07	2.607e-08
24713	4.78001e-07	1.63652e-08
34251	4.78007e-07
18104	4.78069e-07	9.10987e-09
21359	4.78225e-07	3.25653e-08
18240	4.78299e-07	2.49356e-08
13989	4.78309e-07	2.64873e-08
12213	4.78455e-07	3.24196e-08
18407	4.78586e-07	3.33921e-08
26054	4.78605e-07	3.86689e-08
16573	4.78618e-07	1.3668e-07
10876	4.78697e-07	4.02962e-08
13857	4.78802e-07	6.40371e-09
13621	4.78944e-07	3.02124e-08
23053	4.78945e-07	5.06627e-08
10457	4.7901e-07	1.10673e-07
24328	4.79044e-07	1.73524e-08
16986	4.79178e-07	1.29933e-08
21848	4.79239e-07	6.41633e-08
14448	4.79245e-07	1.13835e-08
14397	4.79383e-07	1.74909e-08
18029	4.79389e-07	2.19155e-08
22392	4.79531e-07	6.53098e-09
10318	4.79535e-07	5.17883e-10
16931	4.79613e-07	2.22771e-08
10116	4.79687e-07	1.97505e-08
17411	4.79753e-07	1.70037e-08
13482	4.79864e-07	2.17068e-08
12766	4.80075e-07	5.58049e-08
11643	4.80276e-07	4.88267e-10
10271	4.80356e-07	2.54865e-08
19348	4.80367e-07	3.12352e-08
16368	4.80451e-07	2.30597e-08
12849	4.80477e-07	2.8649e-08
24027	4.80484e-07	2.75492e-08
15768	4.80581e-07	5.94932e-09
16889	4.80681e-07	2.73484e-08
27330	4.80788e-07	6.89005e-09
25401	4.80843e-07	2.6669e-08
22048	4.8095e-07	3.36518e-08
12535	4.81016e-07	1.14332e-08
27292	4.81084e-07	4.73573e-08
23437	4.81276e-07	2.46775e-08
21526	4.81331e-07	2.20789e-08
16088	4.81342e-07	3.03406e-09
17354	4.81437e-07	7.15827e-08
17420	4.81445e-07	1.3061e-08
19050	4.81491e-07	8.82791e-09
19664	4.81517e-07	4.69994e-08
10146	4.81557e-07	9.04168e-09
28880	4.8168e-07	1.94217e-08
28713	4.81763e-07	1.88499e-08
10612	4.81917e-07	1.53977e-09
17389	4.81946e-07	1.16309e-07
14204	4.81971e-07	1.00713e-07
10229	4.82167e-07	7.56458e-09
17518	4.82366e-07	4.68466e-08
17665	4.82455e-07	1.41767e-08
15649	4.82487e-07	1.76098e-08
32941	4.82498e-07	5.13016e-08
14734	4.8259e-07	1.33227e-07
16301	4.82726e-07	3.34116e-08
15096	4.82732e-07	2.4219e-08
23065	4.82988e-07
24410	4.83238e-07	1.61844e-08
14278	4.833e-07	4.51209e-08
19047	4.83307e-07	7.90063e-08
21747	4.83436e-07	3.07552e-08
16654	4.83834e-07	1.0198e-07
14297	4.83858e-07	2.95138e-08
18638	4.8392e-07	1.73197e-08
14741	4.83998e-07	2.96266e-08
21207	4.84155e-07	4.21951e-10
20902	4.84326e-07	5.25504e-08
20284	4.84568e-07	4.03808e-08
13990	4.84642e-07	7.86114e-08
11134	4.84657e-07	9.21361e-08
26877	4.84658e-07	1.29262e-08
19479	4.84714e-07	2.66547e-08
25735	4.84819e-07	1.42848e-08
21318	4.85141e-07	3.03464e-08
19816	4.85293e-07	4.0753e-08
13042	4.85336e-07	3.74994e-08
18463	4.85547e-07	3.67486e-08
16467	4.85573e-07	6.77111e-08
24507	4.8558e-07	1.65318e-08
24790	4.85599e-07	3.15954e-08
15220	4.85605e-07	6.54588e-08
16777	4.85629e-07	1.50939e-08
29674	4.85686e-07	4.18091e-08
32336	4.85719e-07	9.0215e-08
13459	4.85753e-07	2.09681e-08
26602	4.85828e-07	3.91481e-08
22517	4.8587e-07	2.1345e-08
103148	4.86019e-07	3.2121e-08
12006	4.8615e-07	4.7098e-09
20214	4.86251e-07	3.34336e-08
30587	4.86282e-07	5.28007e-08
24888	4.8641e-07	1.14702e-08
10467	4.86468e-07	6.80685e-09
19833	4.86532e-07	2.21744e-09
10302	4.8682e-07	3.26338e-08
26903	4.86868e-07	2.48379e-08
15677	4.86896e-07	3.76137e-08
10187	4.87082e-07	1.82228e-08
13166	4.87147e-07	1.44478e-08
12026	4.87347e-07	2.01634e-08
17933	4.87537e-07	3.24002e-08
24277	4.87603e-07	2.64388e-08
14450	4.8763e-07	6.45125e-09
18143	4.87649e-07	6.80243e-09
33885	4.87982e-07	4.61178e-08
38068	4.88001e-07	1.76986e-07
23092	4.88147e-07	3.07713e-08
21983	4.88362e-07	1.51176e-08	putative neurosecretory
13633	4.88531e-07	1.46956e-08
10501	4.88552e-07	1.63356e-10
12038	4.88701e-07	1.55394e-08
23992	4.88708e-07	2.34024e-08
26216	4.88808e-07	2.8562e-08
20877	4.88865e-07	5.39733e-08
26645	4.89034e-07	9.1068e-09
26292	4.89101e-07	6.60481e-09
13778	4.89128e-07	1.88504e-08
23733	4.89139e-07	2.58176e-08
17173	4.89177e-07	2.37713e-08
10039	4.89355e-07	1.65957e-08
15942	4.89359e-07	4.32164e-08
22479	4.8942e-07	2.05974e-08
15807	4.89435e-07	1.36682e-08
24843	4.89766e-07	3.44599e-08
25348	4.89795e-07	6.56068e-08
22944	4.89854e-07	2.00923e-08
13874	4.8987e-07	3.19571e-09
13736	4.90014e-07	2.06648e-08
11384	4.90317e-07	9.30105e-09
13676	4.90339e-07	2.2274e-08
11090	4.90347e-07	4.2847e-09
19901	4.90427e-07	6.56475e-08
16780	4.90484e-07	4.52064e-08
21298	4.9058e-07	1.28516e-07
16224	4.90622e-07	7.29737e-09
17384	4.90653e-07	3.86342e-08
16390	4.90654e-07	8.07229e-09
17881	4.90727e-07	5.17504e-09
24065	4.90799e-07	1.54654e-08
18386	4.90802e-07	3.53929e-08
11858	4.90885e-07	2.02985e-08
11371	4.90905e-07	1.96031e-08
21904	4.90978e-07	5.11628e-08
15024	4.91068e-07	5.41388e-08
22530	4.91077e-07	2.17823e-08
19591	4.9116e-07	3.35145e-08
16244	4.91178e-07	9.2472e-08
17273	4.91256e-07	6.8292e-08
24957	4.91269e-07	7.21278e-08
16899	4.9128e-07	1.94646e-08
13285	4.91335e-07	1.25446e-07
11252	4.91562e-07	2.10586e-08
18668	4.91661e-07	3.80248e-08
15008	4.91734e-07	3.05164e-08
17848	4.91745e-07	2.76058e-08
25431	4.91766e-07	4.03921e-08
19928	4.91846e-07	5.90817e-08
24661	4.91891e-07
11978	4.91933e-07	1.77094e-09
29164	4.92076e-07	5.05474e-09
21012	4.92159e-07	1.9753e-08
17126	4.92292e-07	5.12266e-08
22458	4.92537e-07	1.74323e-08
28497	4.92671e-07	2.77365e-08
11606	4.92765e-07	1.57681e-08
10492	4.92813e-07	1.26797e-08
18545	4.92887e-07	4.12028e-08
10789	4.92901e-07	9.00439e-09
26799	4.92923e-07	2.95419e-08
13499	4.92935e-07	1.24898e-08
11749	4.92989e-07	2.06003e-09
27826	4.93044e-07	2.33218e-08
22792	4.93085e-07	2.08607e-08
14580	4.9322e-07	1.68913e-08
17808	4.93245e-07	6.36473e-08
22882	4.93352e-07	3.48448e-08
158023	4.93377e-07
27686	4.93382e-07	1.14756e-08
10877	4.93418e-07	1.36377e-08
27328	4.93433e-07	6.60047e-08
29235	4.9347e-07	2.30677e-09
22006	4.93599e-07	2.90098e-08
19404	4.9372e-07	3.05059e-08
23159	4.93811e-07	3.88439e-08
29411	4.93905e-07	4.82657e-08
10268	4.93962e-07	1.1903e-08
23664	4.94044e-07	6.14692e-08
10620	4.94311e-07	1.63116e-08
24308	4.94618e-07	6.90538e-08
27229	4.94697e-07	7.72534e-08
15788	4.94714e-07	3.07102e-08
14306	4.94734e-07	6.91964e-09
10167	4.94767e-07	7.06328e-09
10852	4.94876e-07	1.49855e-09
152577	4.94889e-07	9.41487e-09
20630	4.95198e-07	2.47686e-08
31512	4.95236e-07	3.00634e-08
25321	4.95354e-07	5.71487e-08
14052	4.95451e-07
23825	4.95468e-07	1.00875e-07
101794	4.95471e-07	3.23202e-08
19163	4.9548e-07	3.0622e-08
13626	4.95496e-07	9.03013e-09
19559	4.95583e-07	1.90116e-08
13629	4.95712e-07	1.50377e-08
22572	4.95731e-07	4.96383e-08
17678	4.9591e-07	1.72807e-08
14564	4.96052e-07
12019	4.96078e-07	2.68319e-08
14136	4.96298e-07
11666	4.96303e-07	6.75978e-08
29114	4.96433e-07	3.51083e-08
17274	4.96464e-07	6.65263e-09
12892	4.96493e-07
24221	4.96614e-07	5.92628e-08
14862	4.96616e-07	1.39197e-08
12954	4.96771e-07	1.2909e-08
20385	4.96799e-07	2.84192e-08
19153	4.96863e-07	3.17981e-08
18031	4.96893e-07	2.26901e-08
22569	4.96895e-07	3.87975e-08
19357	4.96928e-07	2.1338e-08
26493	4.97e-07	4.39544e-08
24152	4.97038e-07	6.26971e-09
16982	4.97231e-07	9.8664e-09
20961	4.97274e-07	6.02943e-09
16545	4.97275e-07	2.43872e-08
21978	4.973e-07	2.42158e-08
12158	4.97401e-07	1.02641e-08
24168	4.97464e-07	8.97104e-08
18484	4.97506e-07	3.69953e-08
26794	4.97721e-07	4.98349e-08
25357	4.97844e-07	4.47658e-08
11484	4.98112e-07	6.47802e-09
11502	4.98178e-07	3.44449e-09
26314	4.98233e-07	3.24404e-08
16641	4.98384e-07	3.96361e-08
16820	4.98629e-07	5.5466e-08
20328	4.98646e-07	3.85151e-08
23072	4.98655e-07	3.13364e-08
24403	4.98684e-07	1.11004e-07
25122	4.98693e-07	2.44674e-09
10076	4.98826e-07	2.52683e-08
15445	4.98866e-07	3.90813e-09
15845	4.99005e-07	3.65369e-08
15762	4.99031e-07	4.82214e-08
16041	4.9923e-07	3.87806e-08
13249	4.99334e-07	1.76999e-08
21101	4.99483e-07	2.2165e-09
21116	4.99498e-07	2.1341e-08
27150	4.99521e-07	7.75801e-09
24371	4.99521e-07	3.56124e-08
23445	4.99547e-07	3.34503e-08
16184	4.99567e-07	3.124e-08
13125	4.99588e-07	1.41955e-08
29853	4.99607e-07	7.19371e-08
15899	4.9964e-07	1.6942e-08
10790	4.99691e-07	1.09586e-08
22953	4.99729e-07	7.99828e-08
31021	4.99746e-07	1.45585e-09
12951	4.99759e-07
157590	4.99871e-07	1.50604e-08
14555	4.99902e-07	4.69513e-08
11050	5.00009e-07	1.8864e-08
17676	5.00018e-07	2.08497e-08
15924	5.00048e-07	1.18333e-08
11591	5.00069e-07	7.19699e-10
24160	5.00184e-07	1.04046e-08
22900	5.00284e-07	2.44829e-08
22389	5.00333e-07	3.64507e-08
10554	5.00333e-07	1.55867e-08
24439	5.00355e-07	5.83037e-08
22127	5.00487e-07	9.02592e-09
17006	5.00711e-07	2.60889e-09
17790	5.00918e-07	3.96302e-08
15940	5.01297e-07	3.99312e-08
31820	5.01348e-07	2.39552e-08
10335	5.01381e-07	2.2084e-08
13824	5.01423e-07	2.2919e-08
18255	5.01486e-07	3.01198e-08
35133	5.01578e-07	6.16152e-08
11578	5.01615e-07	7.62609e-10
16705	5.01649e-07	2.31889e-08
23012	5.0176e-07	1.57831e-08
14659	5.01794e-07	1.14733e-09
25324	5.01813e-07	3.49929e-08
27386	5.01892e-07	5.6144e-08
15824	5.01937e-07	3.98678e-08
32397	5.01971e-07	3.49045e-07
14838	5.02022e-07	2.09502e-08
10715	5.02046e-07	1.93456e-08
31721	5.02049e-07	2.05712e-08
17159	5.02057e-07	3.63471e-09
20654	5.02169e-07	2.67788e-08
17617	5.02285e-07	2.2081e-08
19594	5.02485e-07	6.64467e-09
13265	5.02486e-07	5.1982e-08
14155	5.02572e-07	2.02251e-08
15665	5.02649e-07	6.31363e-08
14295	5.0276e-07	3.6398e-09
20103	5.02913e-07	1.44319e-08
23797	5.03063e-07	7.46956e-08
14358	5.03156e-07	2.84123e-08
11826	5.03377e-07	3.6999e-08
19716	5.03453e-07	2.64914e-08
12906	5.03509e-07	1.10256e-08
21194	5.03699e-07	1.43897e-08
14324	5.03706e-07	1.64656e-08
38204	5.03762e-07	1.63563e-08
16077	5.03794e-07	4.04663e-08
19027	5.03931e-07	3.86955e-08
21090	5.03941e-07	4.51162e-08
22367	5.04013e-07	2.08529e-08
19987	5.04073e-07	3.61127e-08
12440	5.04192e-07	1.67045e-08
24895	5.04252e-07	3.84802e-09
26222	5.04263e-07	2.80543e-08
17771	5.04312e-07	1.37809e-08
15799	5.04374e-07	3.09918e-08
20016	5.04435e-07	7.85578e-08
15055	5.04521e-07	3.20357e-09
16621	5.04675e-07
12404	5.04786e-07	6.12367e-09
15100	5.04874e-07	7.99848e-10
11172	5.04894e-07	8.25056e-09
14554	5.04906e-07	2.73112e-08
18332	5.04992e-07	2.02875e-09
11111	5.05115e-07	2.85889e-08
16110	5.05135e-07	1.70851e-08
26138	5.05138e-07	4.52901e-08
11043	5.05147e-07	7.84744e-08
33478	5.05225e-07	5.34012e-08
10258	5.05395e-07	3.64654e-08
23440	5.05451e-07	1.35405e-08
16891	5.05463e-07	2.75716e-09
11750	5.05666e-07	1.83756e-08
22909	5.05679e-07	7.43335e-08
14206	5.05708e-07	2.11569e-08
20832	5.0574e-07	3.20832e-09
15984	5.0592e-07	4.7058e-08
22877	5.05925e-07	5.26375e-08
20989	5.06007e-07	5.07228e-08
25659	5.06218e-07	1.20218e-08
28660	5.0625e-07	1.39674e-08
10096	5.06271e-07	1.21641e-08	putative neurosecretory
11569	5.06443e-07	2.30366e-08
19173	5.06472e-07	1.68567e-09
21687	5.06503e-07	4.01535e-08
21984	5.06696e-07	4.02317e-09
14320	5.0672e-07	1.08277e-08
19990	5.06838e-07	1.69883e-09
23598	5.06845e-07	2.18428e-09
19291	5.06956e-07	3.98878e-08
11791	5.06979e-07	4.33331e-09
14058	5.06994e-07	2.21278e-08
100641	5.07064e-07	9.31174e-08
25875	5.07162e-07	9.34811e-09
13536	5.07395e-07	6.62762e-09
22836	5.07462e-07	5.96401e-08
22661	5.07548e-07	8.12783e-08
22546	5.07554e-07	7.938e-08
12929	5.07582e-07	4.16105e-09
22864	5.07601e-07	4.51173e-08
14354	5.07657e-07	2.56788e-08
16637	5.07775e-07	2.66951e-08
14630	5.07782e-07	7.44471e-08
24428	5.078e-07	4.22408e-08
22316	5.07826e-07	2.61809e-08
10274	5.07883e-07	2.41467e-09
22623	5.07908e-07	2.14308e-09
21754	5.07961e-07	5.04208e-08
31835	5.08027e-07	3.35515e-08
15882	5.08122e-07	1.64592e-08
21964	5.08152e-07	9.88222e-09
13191	5.08411e-07	6.888e-10
20330	5.08543e-07	4.40527e-08
22096	5.08589e-07	9.08928e-09
11357	5.08663e-07	2.59631e-08
12238	5.08689e-07	6.39965e-09
20044	5.08879e-07	6.62168e-08
28341	5.08903e-07	2.88207e-08
23475	5.08938e-07	4.46359e-08
12880	5.08978e-07	5.8416e-09
24647	5.091e-07	1.29385e-09
[truncated: 2,991 more rows]
